# Supplementary material for: Oxidation Dynamics: Critical Differences in Early-Stage Oxidation of NiCr and NiCrMo Alloys
Source: Research Square preprint supplement (doi:10.21203/rs.3.rs-6012757/v1), 2025-02-24
Supplement: Supplementary file 1 [file 1723265093c643a33df9f98f.docx]

**Supplemental Information**

**Oxidation Dynamics: Critical Differences in Early-Stage Oxidation of NiCr and NiCrMo Alloys**

Keithen Orson1, Devin Jessup1, Zachary D. Harris2, Jerzy T. Sadowski3, Petra Reinke1

1 Department of Materials Science and Engineering, University of Virginia, Charlottesville, VA 22904

2 Department of Mechanical Engineering and Materials Science, University of Pittsburgh, Pittsburgh, PA, 15261

3 Center for Functional Nanomaterials, Brookhaven National Laboratory, Upton, NY 11973

**S.1 Determination of surface work function by LEEM-IV**

The variations in the local work function were determined with low-energy electron microscopy with varied voltage and measured intensity (LEEM-IV).(Nair et al., 2023) This produces a stack of images recorded at varying start voltages. Start voltage refers to the bias applied to the sample in addition to the magnitude of the accelerating voltage. For example, the electron accelerating voltage is 20 keV, the sample is biased at a baseline of -20 keV, and then the start voltage is an additional bias applied to the sample to determine the exact mirror point where the electrons are are perfectly reflected. The position of the inflection point in the intensity versus voltage plot happens when the incoming electrons overcome the surface potential of the sample. Hence the measurement can provide information about the work function differences between the different grains. The average intensity for each grain was determined by making an image mask of each grain.

The work function of the alloy varies across the surface, which leads to the intensity contrast that can be seen in figure S1 (a). The position of the inflection point in the LEEM IV curve for each grain represents the relative work function and is shown in figure S1 (b) below. The start energy is the relative bias applied to the substrate compared to the accelerating voltage of the electron beam, and the intensity represents average electron yield per pixel across the three grains captured in the field of view. The average values of the IV curves for each grain was calculated by masking each respective grain. The position of the inflection point was found using the minimum of the numerical derivative of intensity with respect to start voltage. These values are not calibrated to an absolute work function reference and are reported as relative values. The order of work function is therefore 𝜙 (L grain) > 𝜙 (C grain) > 𝜙 (R grain) and the relative values are +0 (L grain), +0.9 (C grain), and +1.2 (R grain).

**Figure S1**: (a) Representative LEEM-IV image with 3 eV start energy; (b) the average intensity-voltage curves for the LEEM IV curve on each grain with the position of the inflection point marked.

**S.2** **Determination of oxide fraction from cosine similarity**

Cosine similarity was used to quantitatively determine how much oxide and metal are present in the hyperspectral images for each pixel in the image using the XAS spectra. The advantage of this method is that the calculation is fast and does not fail to converge in noisy spectra. This method has been used previously for XPEEM analysis and is described in reference [14] in the main body of the manuscript. Cosine similarity is defined in equation 1, where Refx is the vector representing a reference spectrum and Ni is the experimental spectrum at pixel *i*.

(1)

Since oxide and metal are the only components needed here a normalized cosine similarity is used for calculation that is defined below in equation 2, where CSxi is cosine similarity to reference *X* at pixel *i,* where X is either Cr2O3 or Cr(0)

(2)

Cosine similarity cannot be analytically converted to a fraction of two signals, but for visualization and conceptualization it is desirable to represent the mixed metal/oxide signal as a fraction of oxide and metal signals. This is done by finding the normalized cosine similarity of 100 synthetic spectra evenly space between a fraction of 0 and 1. Polynomial regression was used to convert between a normalized cosine similarity score and a known oxide fraction, so that the same expression can be used to relate a known cosine similarity score to an unknown oxide fraction. This method is valid for a normalized cosine similarity score between 0.448 and 0.552.

**Figure S2:** (a) Illustration of a synthetic mixture of Cr and Cr2O3 spectra in linear combinations ranging from 0-1 for a selection of spectra. In total 100 spectra were generated, only 10 are shown in the graph. (b) The normalized cosine similarity value calculated for that linear combination given the known oxide fractions.

**S.3 Ni 2p and O1s - additional information from the oxidation sequence with XPS for the ternary alloy Ni22Cr6Mo**

The XPS measurements in the replica experiment include the Cr 2p3/2, O1s, Ni 2p3/2, C1s, and Mo3d core levels. Only the Cr 2p3/2 and Mo3d are presented in the main body, and the O1s and Ni 2p3/2 are discussed here. Very little change is observed in the Ni 2p3/2 peak over the course of the oxidation experiment, which is shown in Figure S3 (a). The peak shape for Ni agrees well with the expected peak position and satellite position for Ni metal throughout all stages of the oxidation experiment, and we conclude no NiO is formed at these stages of oxidation.(Payne et al., 2012) The O 1s peak position agrees well with expected peak position of Cr2O3 in agreement with the results reported in the manuscript.(Biesinger et al., 2011) The angle resolved O 1s spectra at 60 L of oxygen exposure are shown in figure S3 (b). There is essentially no change with angle in the O 1s spectra, indicating that depth variations in oxide are small and likely caused by the slight changes in the Mo-doping of the chromia layer. The corresponding angle resolved XPS for Cr and Mo are included in the manuscript.

(b)

(a)

**Figure S3:** (a) Ni2p3/2 XPS spectra of the surface after 0 L and 60 L of oxygen exposure. (b) Angle resolved O1s takeoff angles of 36˚, 63˚, and 90˚ for the surface, intermediate, and bulk sensitive measurements respectively

**S.4:**  **Characterization of Ni22Cr6Mo with EBSD: Exposure replication**

To confirm the observation of a smooth oxide a second Ni22Cr6Mo sample was prepared and studied with XPEEM. A representative LEEM image of the replication sample is shown in figure S4(a). The fiducial markers seen in the center of figure S4(a) were used in conjunction with EBSD to determine the surface orientation of the two grains in the single energy timeseries and hyperspectral images. Unfortunately, no LEED data are available for this study.

The EBSD map is shown in figure S4(b) and the fiducial markers are clearly visible in the bottom of the map. The surface orientations were determined to be close to (114) and (314) with a small degree of misorientation (~5˚). For brevity the grains in this section will be referred to as (114) and (314) grains.

(b)

(a)

(c)

**Figure S4**: (a) Representative SEM Image of the Ni22Cr6Mo surface (b) EBSD map of the region of interest (c) Stereographic triangle showing the orientation of the surface grains determined by EBSD

**S.5:**  **Oxidation of Ni22Cr6Mo: Exposure replication**

The oxidation of Ni22Cr6Mo was repeated for a different sample section at the 23-ID-2 beamline. This is to test the layer-by-layer growth mode seen in the presence of Mo for the main sample discussed in the manuscript. While this is the same alloy sample, the second experiment uses a different grain orientation which are positioned inside the crystallographic triangle as shown in S.4. The same temperature, pressure, and duration of exposure conditions were used as described in the experimental section for the first sample. In summary, we observe again a layer-by-layer growth mode and the roughness variation over exposure time is included in Figure 3.

Single energy XPEEM images are presented at the beginning (0 L) and end (60 L) of oxidation for the XPEEM in Figure S5 (a,b). There is some surface contamination visible in the lighter spots in the XPEEM image, but no new islands are formed during the oxidation process, and the contaminants are unaffected by the oxidation process. This is confirmed in the Figure S5 (c) which shows the relative fraction of Cr2O3 signal across the surface from a cosine similarity analysis. The oxide fraction is relatively evenly distributed across the surface, although the residual surface contamination affect the oxide concentration locally. The grain boundary in figure S5(c) appears to shift rapidly from metallic to oxidic. We conclude that this gradient is not a real gradient but due to differential charging effects. The calculated normalized cosine similarity value for much of the grain boundary region is outside the valid range for interpretation. This may originate from the height difference between the grains caused by differential etching during silica polishing. For this reason, we do not believe any detailed analysis of the grain boundary behavior here is possible.

**(c)**

**(b)**

**(a)**

**Figure S5**: Select images in the single energy XPEEM timeseries of the Ni22Cr6Mo oxidation at (a) 0 L and (b) 60 L of oxygen exposure. (c) Cr2O3 signal fraction determined from the hyperspectral XAS L-edge after 60 L of oxygen exposure using cosine similarity as described in S2

**References**

Biesinger, M. C., Payne, B. P., Grosvenor, A. P., Lau, L. W. M., Gerson, A. R., & Smart, R. S. C. (2011). Resolving surface chemical states in XPS analysis of first row transition metals, oxides and hydroxides: Cr, Mn, Fe, Co and Ni. *Applied Surface Science*, *257*(7), 2717–2730. https://doi.org/10.1016/j.apsusc.2010.10.051

Nair, S., Yang, Z., Lee, D., Guo, S., Sadowski, J. T., Johnson, S., Saboor, A., Li, Y., Zhou, H., Comes, R. B., Jin, W., Mkhoyan, K. A., Janotti, A., & Jalan, B. (2023). Engineering metal oxidation using epitaxial strain. *Nature Nanotechnology*, *18*(9), 1005–1011. https://doi.org/10.1038/s41565-023-01397-0

Payne, B. P., Biesinger, M. C., & McIntyre, N. S. (2012). Use of oxygen/nickel ratios in the XPS characterisation of oxide phases on nickel metal and nickel alloy surfaces. *Journal of Electron Spectroscopy and Related Phenomena*, *185*(5–7), 159–166. https://doi.org/10.1016/j.elspec.2012.06.008
